# Supplementary material for: Evolution of the Colocasiomyia gigantea Species Group (Diptera: Drosophilidae): Phylogeny, Biogeography and Shift of Host Use
Source: MDPI journal article supplement (doi:10.3390/insects13070647), 2022-07-18
Supplement: s1 [file s1]

**Table S2.** GenBank accession numbers of DNA sequences of eight molecular markers employed in the present study.

| Species group   | Species                 | Voucher specimens and corresponding GenBank accession numbers |                         |                         |                         |                         |                         |                         |                         |
|-----------------|-------------------------|---------------------------------------------------------------|-------------------------|-------------------------|-------------------------|-------------------------|-------------------------|-------------------------|-------------------------|
|                 |                         | COI                                                           | COII                    | 28S                     | ATPsyn-alpha            | ATPsyn-gamma            | alphaTub84B             | Hsc70cb                 | EF-2                    |
| <i>cristata</i> | <i>colocasiae</i>       | (OK382964) <sup>a</sup>                                       | (OK377094) <sup>a</sup> | (OK393944) <sup>a</sup> | (OK377073) <sup>a</sup> | (OK442375) <sup>a</sup> | (OK442396) <sup>a</sup> | (OK442415) <sup>a</sup> | (OK442436) <sup>a</sup> |
|                 | <i>cristata</i>         | (OK382965) <sup>a</sup>                                       | (OK377095) <sup>a</sup> | (OK393945) <sup>a</sup> | (OK373074) <sup>a</sup> | (OK442376) <sup>a</sup> | (OK442397) <sup>a</sup> | (OK442416) <sup>a</sup> | (OK442437) <sup>a</sup> |
|                 | <i>sarawakana</i>       | (OK382975) <sup>a</sup>                                       | (OK377107) <sup>a</sup> | (OK393957) <sup>a</sup> | (OK377086) <sup>a</sup> | (OK442388) <sup>a</sup> | n/a                     | (OK442428) <sup>a</sup> | (OK442449) <sup>a</sup> |
|                 | <i>ecornuta</i>         | (OK382976) <sup>a</sup>                                       | (OK377108) <sup>a</sup> | (OK393958) <sup>a</sup> | (OK377087) <sup>a</sup> | (OK442389) <sup>a</sup> | (OK442408) <sup>a</sup> | (OK442429) <sup>a</sup> | (OK442450) <sup>a</sup> |
|                 | <i>xenalocasiae</i>     | (KY404116) <sup>b</sup>                                       | (OK377113) <sup>a</sup> | (OK393963) <sup>a</sup> | (OK377092) <sup>a</sup> | (OK442394) <sup>a</sup> | (OK442413) <sup>a</sup> | (OK442434) <sup>a</sup> | (OK442455) <sup>a</sup> |
| <i>gigantea</i> | <i>gigantea</i>         | (OK382967) <sup>a</sup>                                       | (OK377097) <sup>a</sup> | (OK393947) <sup>a</sup> | (OK377076) <sup>a</sup> | (OK442378) <sup>a</sup> | (OK442399) <sup>a</sup> | (OK442418) <sup>a</sup> | (OK442439) <sup>a</sup> |
|                 | <i>hailini</i>          | (KJ700928) <sup>c</sup>                                       | (OK377098) <sup>a</sup> | (OK393948) <sup>a</sup> | (OK377077) <sup>a</sup> | (OK442379) <sup>a</sup> | (OK442400) <sup>a</sup> | (OK442419) <sup>a</sup> | (OK442440) <sup>a</sup> |
|                 | <i>longifilamentata</i> | (OK382969) <sup>a</sup>                                       | (OK377100) <sup>a</sup> | (OK393950) <sup>a</sup> | (OK377079) <sup>a</sup> | (OK442381) <sup>a</sup> | (OK442402) <sup>a</sup> | (OK442421) <sup>a</sup> | (OK442442) <sup>a</sup> |
|                 | <i>longivalva</i>       | (OK382970) <sup>a</sup>                                       | (OK377101) <sup>a</sup> | (OK393951) <sup>a</sup> | (OK377080) <sup>a</sup> | (OK442382) <sup>a</sup> | (OK442403) <sup>a</sup> | (OK442422) <sup>a</sup> | (OK442443) <sup>a</sup> |
|                 | <i>scindapsae</i>       | (KJ700886) <sup>c</sup>                                       | (OK377102) <sup>a</sup> | (OK393952) <sup>a</sup> | (OK377081) <sup>a</sup> | (OK442383) <sup>a</sup> | (OK442404) <sup>a</sup> | (OK442423) <sup>a</sup> | (OK442444) <sup>a</sup> |
|                 | <i>yini</i>             | (KJ700929) <sup>b</sup>                                       | (OM988106) <sup>f</sup> | (OM943992) <sup>f</sup> | (ON107166) <sup>f</sup> | (ON107172) <sup>f</sup> | (ON107162) <sup>f</sup> | (ON157521) <sup>f</sup> | (ON157525) <sup>f</sup> |
|                 | <i>rhaphidophorae</i>   | (KJ700893) <sup>c</sup>                                       | (OM988104) <sup>f</sup> | (OM943989) <sup>f</sup> | (ON107165) <sup>f</sup> | (ON107170) <sup>f</sup> | (ON107161) <sup>f</sup> | (ON157159) <sup>f</sup> | (ON157523) <sup>f</sup> |
|                 | <i>liae</i>             | (MT916870) <sup>d</sup>                                       | (OM988103) <sup>f</sup> | (OM943990) <sup>f</sup> | (ON107164) <sup>f</sup> | (ON107169) <sup>f</sup> | (ON107160) <sup>f</sup> | (ON157518) <sup>f</sup> | (ON157526) <sup>f</sup> |
|                 | <i>todayi</i>           | (MT916897) <sup>d</sup>                                       | (OM988105) <sup>f</sup> | (OM943991) <sup>f</sup> | (ON107167) <sup>f</sup> | (ON107171) <sup>f</sup> | (ON107159) <sup>f</sup> | (ON157520) <sup>f</sup> | (ON157524) <sup>f</sup> |
|                 | <i>daiae</i>            | (OM037606) <sup>e</sup>                                       | (OM988102) <sup>f</sup> | (OM943988) <sup>f</sup> | (ON107163) <sup>f</sup> | (ON107168) <sup>f</sup> | (ON107158) <sup>f</sup> | (ON157517) <sup>f</sup> | (ON157522) <sup>f</sup> |

<sup>a</sup> Sequences determined in Takano *et al.* (2021); <sup>b</sup> Sequences determined in Li *et al.* (2014); <sup>c</sup> Sequences determined in Shi *et al.* (2019); <sup>d</sup> Sequences determined in Jiao *et al.* (2020); <sup>e</sup> Sequences determined in Xue *et al.* (2022); <sup>f</sup> Sequences determined in the present study
