# Supplementary material for: Evolution of the Colocasiomyia gigantea Species Group (Diptera: Drosophilidae): Phylogeny, Biogeography and Shift of Host Use
Source: MDPI journal article supplement (doi:10.3390/insects13070647), 2022-07-18
Supplement: s1 [file s1]

**Table S1.** Data sets of DNA sequences and corresponding selected model (using the BIC, i.e., Bayesian information criterion).

| Data set <sup>†</sup>    | Model    | #Param | BIC        | AICc       | lnL         | <i>I</i> | <i>I</i> <sup>′</sup> | R       | Freq A | Freq T | Freq C | Freq G | A-T  | A-C  | A-G  | T-A  | T-C  | T-G  | C-A  | C-T  | C-G  | G-A  | G-T  | G-C  |
|--------------------------|----------|--------|------------|------------|-------------|----------|-----------------------|---------|--------|--------|--------|--------|------|------|------|------|------|------|------|------|------|------|------|------|
| COI                      | GTR+G+I  | 37     | 6514.6663  | 6248.8166  | -3087.2647  | 0.5713   | 1.2216                | 2.9217  | 0.3022 | 0.3699 | 0.1643 | 0.1634 | 0.10 | 0.00 | 0.04 | 0.08 | 0.21 | 0.00 | 0.00 | 0.47 | 0.00 | 0.08 | 0.00 | 0.00 |
| COII                     | GTR+G+I  | 37     | 6773.6941  | 6506.4738  | -3216.0985  | 0.5633   | 0.8585                | 3.4115  | 0.3393 | 0.3980 | 0.1432 | 0.1195 | 0.07 | 0.00 | 0.02 | 0.06 | 0.20 | 0.00 | 0.00 | 0.56 | 0.01 | 0.06 | 0.00 | 0.01 |
| 28S                      | T92+G    | 30     | 4254.2247  | 4038.0347  | -1988.9243  | n/a      | 0.2504                | 1.8242  | 0.3436 | 0.3436 | 0.1564 | 0.1564 | 0.06 | 0.03 | 0.11 | 0.06 | 0.11 | 0.03 | 0.06 | 0.23 | 0.03 | 0.23 | 0.06 | 0.03 |
| ATPsyn-alpha             | K2+G     | 29     | 2392.8880  | 2196.3612  | -1069.0470  | n/a      | 0.0500                | 5.6637  | 0.2500 | 0.2500 | 0.2500 | 0.2500 | 0.02 | 0.02 | 0.21 | 0.02 | 0.21 | 0.02 | 0.02 | 0.21 | 0.02 | 0.21 | 0.02 | 0.02 |
| ATPsyn-gamma             | K2+G     | 29     | 3042.3500  | 2846.9499  | -1394.3361  | n/a      | 0.2087                | 3.5205  | 0.2500 | 0.2500 | 0.2500 | 0.2500 | 0.03 | 0.03 | 0.19 | 0.03 | 0.19 | 0.03 | 0.03 | 0.19 | 0.03 | 0.19 | 0.03 | 0.03 |
| alphaTub84B              | K2+G     | 29     | 4448.4560  | 4239.7974  | -2090.8106  | n/a      | 0.1446                | 2.9340  | 0.2500 | 0.2500 | 0.2500 | 0.2500 | 0.03 | 0.03 | 0.19 | 0.03 | 0.19 | 0.03 | 0.03 | 0.19 | 0.03 | 0.19 | 0.03 | 0.03 |
| Hsc70cb                  | K2+G     | 29     | 4962.0847  | 4757.6297  | -2349.7131  | n/a      | 0.3564                | 2.6742  | 0.2500 | 0.2500 | 0.2500 | 0.2500 | 0.03 | 0.03 | 0.18 | 0.03 | 0.18 | 0.03 | 0.03 | 0.18 | 0.03 | 0.18 | 0.03 | 0.03 |
| EF-2                     | K2+G     | 29     | 3515.3487  | 3314.3184  | -1628.0447  | n/a      | 0.2353                | 3.2800  | 0.2500 | 0.2500 | 0.2500 | 0.2500 | 0.03 | 0.03 | 0.19 | 0.03 | 0.19 | 0.03 | 0.03 | 0.19 | 0.03 | 0.19 | 0.03 | 0.03 |
| mt                       | GTR+G+I  | 37     | 13037.8187 | 12745.4897 | -6335.6745  | 0.5733   | 1.1048                | 2.9838  | 0.3211 | 0.3842 | 0.1536 | 0.1410 | 0.09 | 0.00 | 0.03 | 0.07 | 0.20 | 0.00 | 0.00 | 0.51 | 0.01 | 0.07 | 0.00 | 0.01 |
| mt-CP <sub>1</sub>       | TN93+G+I | 34     | 3083.7594  | 2852.6993  | -1392.1705  | 0.5060   | 0.3019                | 13.9507 | 0.2998 | 0.2772 | 0.1664 | 0.2566 | 0.01 | 0.00 | 0.05 | 0.01 | 0.32 | 0.01 | 0.01 | 0.53 | 0.01 | 0.05 | 0.01 | 0.00 |
| mt-CP <sub>2</sub>       | HKY+G    | 32     | 1803.3681  | 1585.9337  | -760.8077   | n/a      | 0.0500                | 1.2166  | 0.2031 | 0.4233 | 0.2250 | 0.1485 | 0.10 | 0.05 | 0.08 | 0.05 | 0.12 | 0.04 | 0.05 | 0.22 | 0.04 | 0.11 | 0.10 | 0.05 |
| mt-CP <sub>3</sub>       | TN93+G   | 33     | 7399.6491  | 7175.3649  | -3554.5136  | n/a      | 0.4995                | 18.2974 | 0.4601 | 0.4522 | 0.0695 | 0.0181 | 0.00 | 0.00 | 0.01 | 0.00 | 0.09 | 0.00 | 0.00 | 0.57 | 0.00 | 0.31 | 0.00 | 0.00 |
| mt-CP <sub>1+2</sub>     | TN93+G+I | 34     | 4789.8675  | 4535.0889  | -2233.4550  | 0.7521   | 0.4091                | 8.0511  | 0.2515 | 0.3502 | 0.1957 | 0.2026 | 0.02 | 0.01 | 0.07 | 0.01 | 0.26 | 0.01 | 0.01 | 0.47 | 0.01 | 0.08 | 0.02 | 0.01 |
| nuPCG                    | TN93+G   | 33     | 17656.4032 | 17373.6438 | -8653.7931  | n/a      | 0.2236                | 3.1514  | 0.2244 | 0.2474 | 0.2684 | 0.2595 | 0.03 | 0.03 | 0.13 | 0.03 | 0.27 | 0.03 | 0.03 | 0.24 | 0.03 | 0.11 | 0.03 | 0.03 |
| nuPCG <sub>1</sub>       | TN93+G+I | 34     | 4049.5862  | 3795.7452  | -1863.7807  | 0.7171   | 0.5808                | 2.9576  | 0.2583 | 0.1876 | 0.2032 | 0.3508 | 0.02 | 0.02 | 0.08 | 0.03 | 0.32 | 0.04 | 0.03 | 0.30 | 0.04 | 0.06 | 0.02 | 0.02 |
| nuPCG <sub>2</sub>       | HKY      | 31     | 3092.3601  | 2860.9481  | -1399.3973  | n/a      | n/a                   | 0.2215  | 0.3202 | 0.2824 | 0.2503 | 0.1470 | 0.11 | 0.10 | 0.03 | 0.13 | 0.05 | 0.06 | 0.13 | 0.05 | 0.06 | 0.06 | 0.11 | 0.10 |
| nuPCG <sub>3</sub>       | GTR+G+I  | 37     | 9911.0151  | 9634.7076  | -4780.2454  | 0.0516   | 1.5922                | 3.6240  | 0.0951 | 0.2722 | 0.3514 | 0.2804 | 0.08 | 0.07 | 0.28 | 0.03 | 0.21 | 0.01 | 0.02 | 0.16 | 0.02 | 0.09 | 0.01 | 0.02 |
| nuPCG <sub>1+2</sub>     | K2+G+I   | 30     | 7059.3710  | 6814.5307  | -3377.2295  | 0.4750   | 0.0500                | 1.6207  | 0.2500 | 0.2500 | 0.2500 | 0.2500 | 0.05 | 0.05 | 0.15 | 0.05 | 0.15 | 0.05 | 0.05 | 0.15 | 0.05 | 0.15 | 0.05 | 0.05 |
| all                      | GTR+G+I  | 37     | 35355.7542 | 35017.5456 | -17471.7524 | 0.4890   | 0.6232                | 2.1653  | 0.2721 | 0.2988 | 0.2148 | 0.2141 | 0.10 | 0.02 | 0.08 | 0.09 | 0.22 | 0.01 | 0.02 | 0.30 | 0.02 | 0.10 | 0.01 | 0.02 |
| all-PCG                  | GTR+G+I  | 37     | 31138.9177 | 30806.5228 | -15366.2375 | 0.4945   | 0.6766                | 2.1870  | 0.2572 | 0.2939 | 0.2294 | 0.2193 | 0.11 | 0.02 | 0.08 | 0.10 | 0.23 | 0.01 | 0.02 | 0.29 | 0.02 | 0.09 | 0.01 | 0.02 |
| all-PCG <sub>CP1</sub>   | TN93+G+I | 34     | 7003.6996  | 6735.6870  | -3333.7828  | 0.6750   | 0.5175                | 5.3406  | 0.2724 | 0.2181 | 0.1907 | 0.3188 | 0.02 | 0.01 | 0.08 | 0.02 | 0.33 | 0.02 | 0.02 | 0.38 | 0.02 | 0.07 | 0.02 | 0.01 |
| all-PCG <sub>CP2</sub>   | HKY+G+I  | 33     | 4739.0861  | 4479.0034  | -2206.4444  | 0.4863   | 0.0500                | 0.6455  | 0.2805 | 0.3303 | 0.2417 | 0.1475 | 0.10 | 0.07 | 0.06 | 0.08 | 0.10 | 0.04 | 0.08 | 0.13 | 0.04 | 0.11 | 0.10 | 0.07 |
| all-PCG <sub>CP3</sub>   | GTR+G    | 36     | 18260.1297 | 17976.3003 | -8952.0824  | n/a      | 1.0529                | 2.0315  | 0.2189 | 0.3332 | 0.2558 | 0.1915 | 0.15 | 0.02 | 0.09 | 0.10 | 0.20 | 0.00 | 0.02 | 0.27 | 0.02 | 0.10 | 0.01 | 0.02 |
| all-PCG <sub>CP1+2</sub> | TN93+G+I | 34     | 11745.1435 | 11453.5292 | -5692.7343  | 0.8128   | 0.5142                | 3.2635  | 0.2764 | 0.2741 | 0.2162 | 0.2332 | 0.03 | 0.02 | 0.09 | 0.03 | 0.26 | 0.03 | 0.03 | 0.32 | 0.03 | 0.10 | 0.03 | 0.02 |

<sup>†</sup>Abbreviations: mt, mitochondrial; nu, nuclear; PCG, protein-coding gene; CP, codon position.
